# Supplementary material for: Motor planning flexibly optimizes performance under uncertainty about task goals
Source: PubMed Central journal article supplement (PMC5337982; doi:10.1038/ncomms14624), 2017-03-03
Supplement: ncomms14624-s1.pdf [file ncomms14624-s1.pdf]

1 **Supplementary Figure 1.** Reaching trajectories from all participants in Experiment 1.

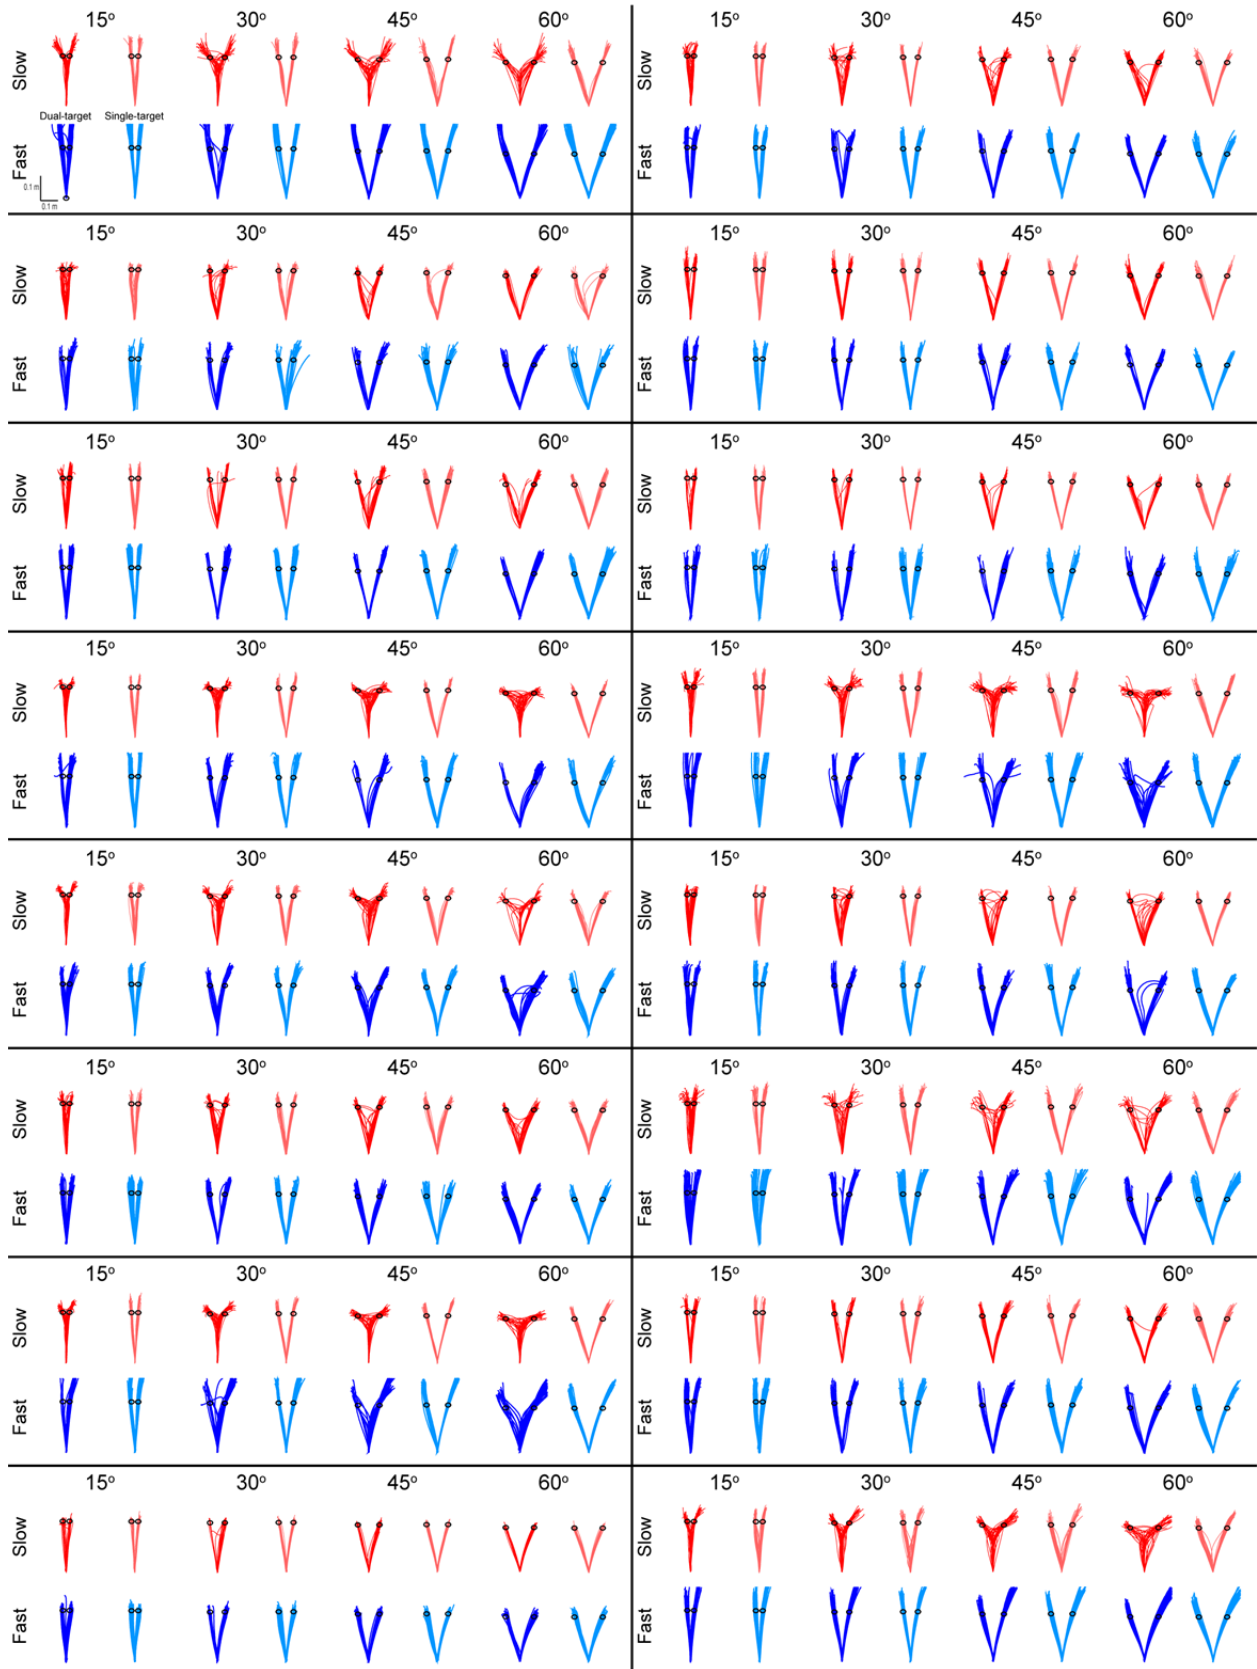

3 Reaches are presented from the 16 participants included in Experiment 1. Reaches are grouped  
4 by target-separation angle (horizontal) and required movement speed (vertical; Slow reaches in  
5 red, Fast reaches in blue). Both dual-target trials (darker colors) and single-target trials (lighter  
6 colors) are shown. These data highlight both the general group-wide tendency to produce  
7 intermediate movements mainly for Slow trials. Additionally, it is possible to observe the  
8 participants who generated no intermediate movements throughout the entire session.  
9  
10

11  
 12 **Supplementary Table 1.** Group-wide model parameters.  
 13

| Target Separation | <b>Fast</b> |            |            |          | <b>Slow</b> |            |            |          |
|-------------------|-------------|------------|------------|----------|-------------|------------|------------|----------|
|                   | $\mu_d$     | $\sigma_d$ | $\sigma_i$ | $\theta$ | $\mu_d$     | $\sigma_d$ | $\sigma_i$ | $\theta$ |
| 15°               | 7.562       | 3.046      | 8.238      | 0.078    | 5.052       | 4.242      | 5.810      | 0.500    |
| 30°               | 15.359      | 3.210      | 4.816      | 0.071    | 13.149      | 4.672      | 3.031      | 0.329    |
| 45°               | 22.205      | 3.353      | 4.884      | 0.045    | 19.964      | 4.964      | 3.836      | 0.397    |
| 60°               | 29.058      | 3.382      | 18.960     | 0.098    | 26.074      | 5.193      | 4.934      | 0.352    |

14  
 15 Parameters shown above reflect the model fits to the pooled data (stage-1 fits), fitted to the data  
 16 from Experiment 1. The particularly large estimate of  $\sigma_i$  for in the Fast 60° condition reflects the  
 17 fact that it was very rare to observe intermediate movements in this condition.  
 18  
 19
